# Supplementary material
Source: HighWire-hosted journal article supplement (https://bmjopen.bmj.com/content/11/5/e046827)
Supplement: inline-supplementary-material-3 [file inline-supplementary-material-3.pdf]

## Supplementary document 3:

The International Classification of Diseases (ICD) codes for retrieval of the cases from the medical records section

| Clinical conditions considered as suspected cases | Codes  |        |
|---------------------------------------------------|--------|--------|
|                                                   | ICD 10 | ICD 9  |
| Intussusception                                   | K56.1  | 560.0  |
| Volvulus                                          | K56.2  | 560.2  |
| Gallstone ileus                                   | K56.3  | 560.31 |
| Other impaction of intestine                      | K56.4  | 560.30 |
| Intestinal adhesions with obstruction             | K56.5  | 560.81 |
| Other and unspecified intestinal obstruction      | K56.6  | 560.9  |
| Ileus, unspecified                                | K56.7  | 560.1  |
| Paralytic ileus                                   | K56.0  |        |

*ICD: International Classification of Diseases*
